# Supplementary material for: L1 Cell Adhesion Molecule Promotes Migration and Invasion via JNK Activation in Extrahepatic Cholangiocarcinoma Cells with Activating KRAS Mutation
Source: PubMed Central journal article supplement — Mol Cells. 2017 May 24;40(5):363–70. doi: 10.14348/molcells.2017.2282 (PMC5463045; doi:10.14348/molcells.2017.2282), 2017-05-24
Supplement: molce-40-5-363-supple.pdf [file molce-40-5-363-supple.pdf]

Supplementary Fig. 1. Primer sequences for RT-PCR

Supplementary Fig. 1. Primer sequences for RT-PCR

| # | Primer  | Sequence (5'-3')                           |
|---|---------|--------------------------------------------|
| 1 | L1CAM-F | CAGATCCCCGAGGAAGAGGGAGTGCCTGGCCACCCC       |
| 2 | L1CAM-R | CTCCCCCTCGAGGAGCCTCACGCGGCCTGTGCCATTGGTCTT |
| 3 | GAPDH-F | ATGAACTTTCTGCTCTCTGG                       |
| 4 | GAPDH-R | TCATCTCTCCTATGTGCTGGC                      |

Supplementary Fig. 2.

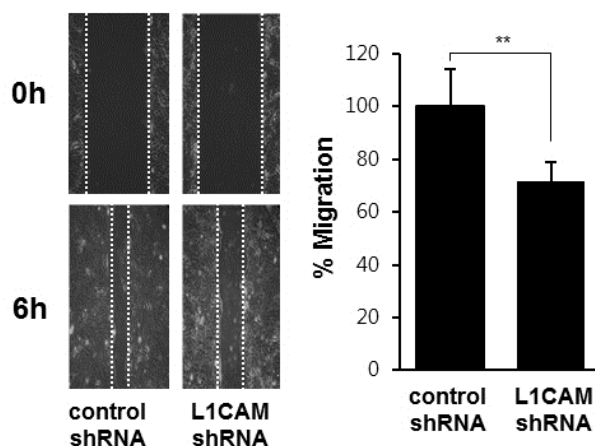

Supplementary Fig. 2. Wound healing assay for L1CAM-depleted and control cells in media supplemented with 10% FBS. Photographs were taken immediately after wound induction and then 6 h later (left panel). Cell migration was quantified by measuring the distance between the cellular leading edge on either side of the scratch, plotted as a percentage relative to the zero time point (right panel). Results are representative of three independent experiments. Data are expressed as the mean  $\pm$  SD (\*\* $p < 0.01$ ).
